# Supplementary material for: Phase behavior of hierarchical mesoporous silicas prepared using ABC triblock copolymers as single templates
Source: Royal Society of Chemistry journal article supplement (doi:10.1039/c3ra41814f), 2013-01-01
Supplement: c3ra41814f.pdf [file c3ra41814f.pdf]

## Supporting Information

### **Phase Behavior of Hierarchical Mesoporous Silicas Prepared Using ABC Triblock Copolymers as Single Templates**

Jheng-Guang Li, Ruei-Bin Lin and Shiao-Wei Kuo\*

\*Corresponding author: [kuosw@faculty.nsysu.edu.tw](mailto:kuosw@faculty.nsysu.edu.tw)

Department of Materials and Optoelectronic Science, Center for Nanoscience and Nanotechnology, National Sun Yat-Sen  
University, Kaohsiung, 804, Taiwan.

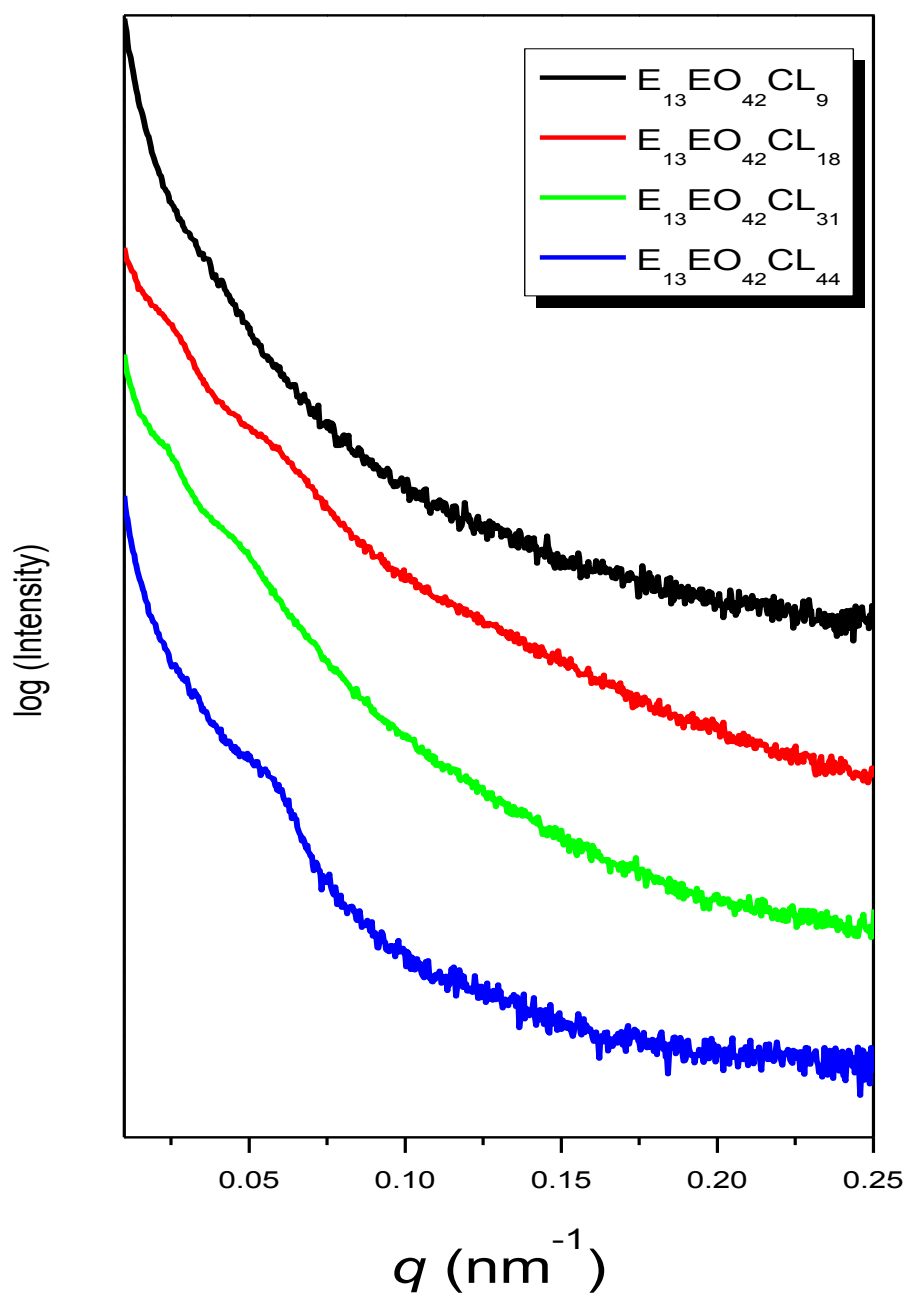

Figure S1: SAXS patterns of various PE-PEO-PCL copolymers

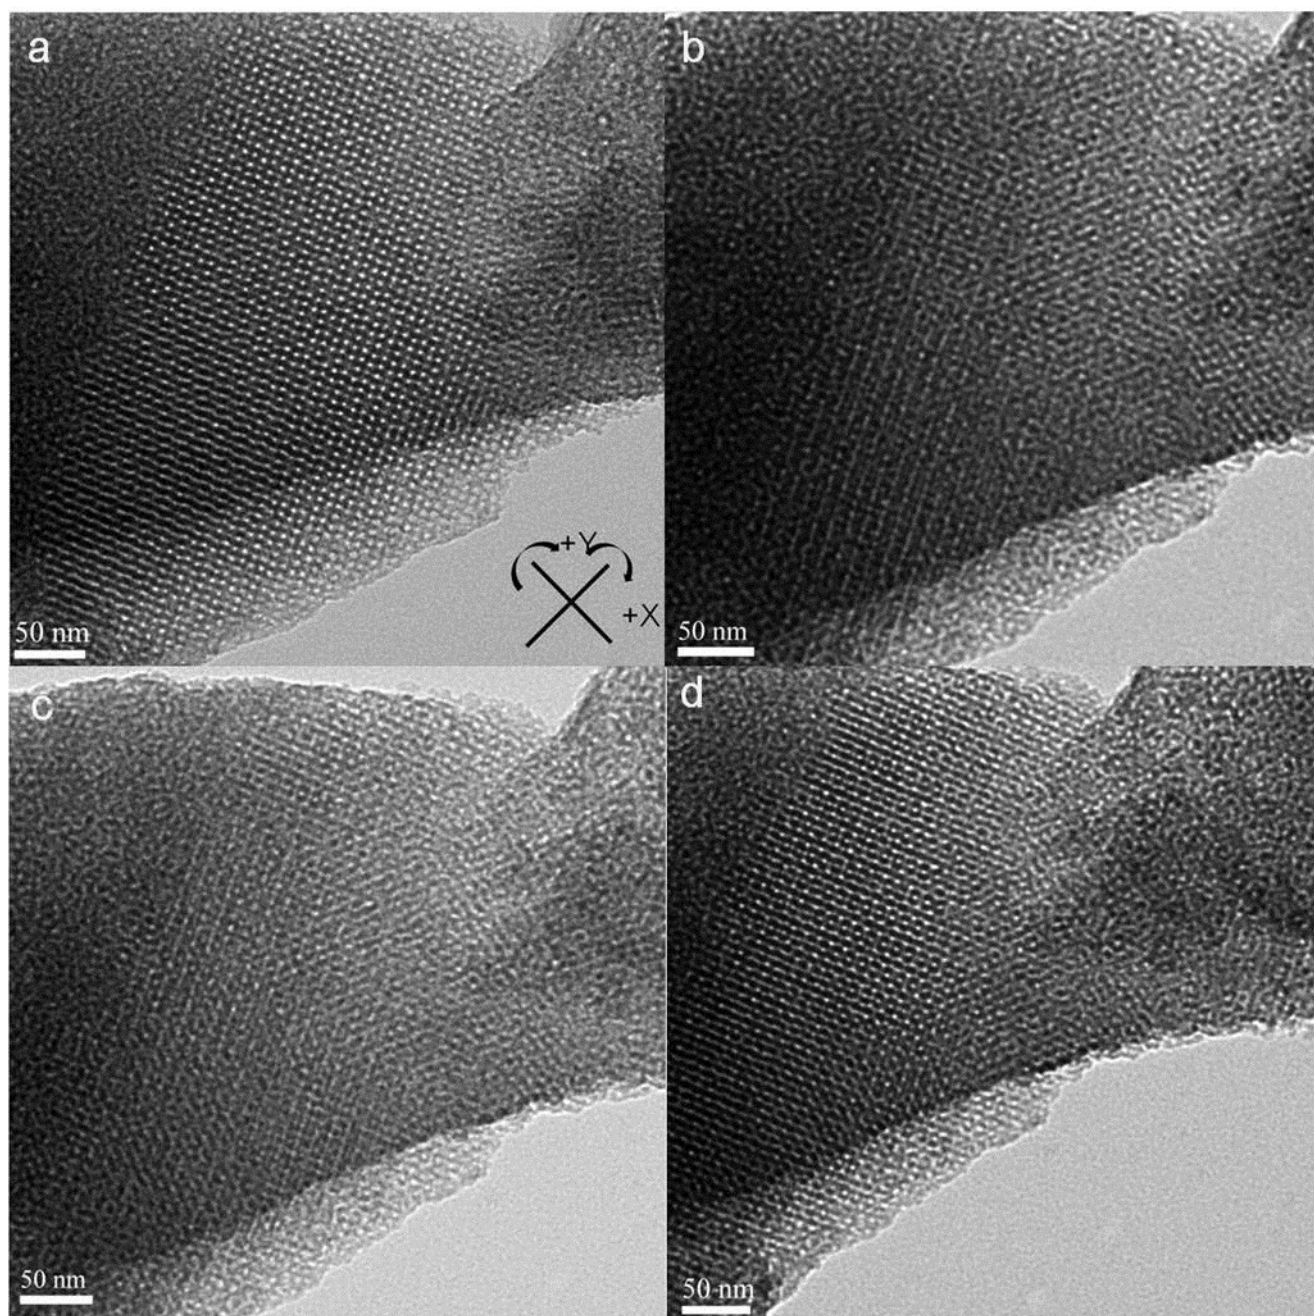

Figure S2. TEM images of mesoporous silica sample E1T40 with tilt angles, (a)  $X=0^\circ$ ,  $Y=0^\circ$ ; (b)  $X=19^\circ$ ; (c)  $X=19^\circ$ ,  $Y=1.3^\circ$ ; (d)  $X=19^\circ$ ,  $Y=3^\circ$

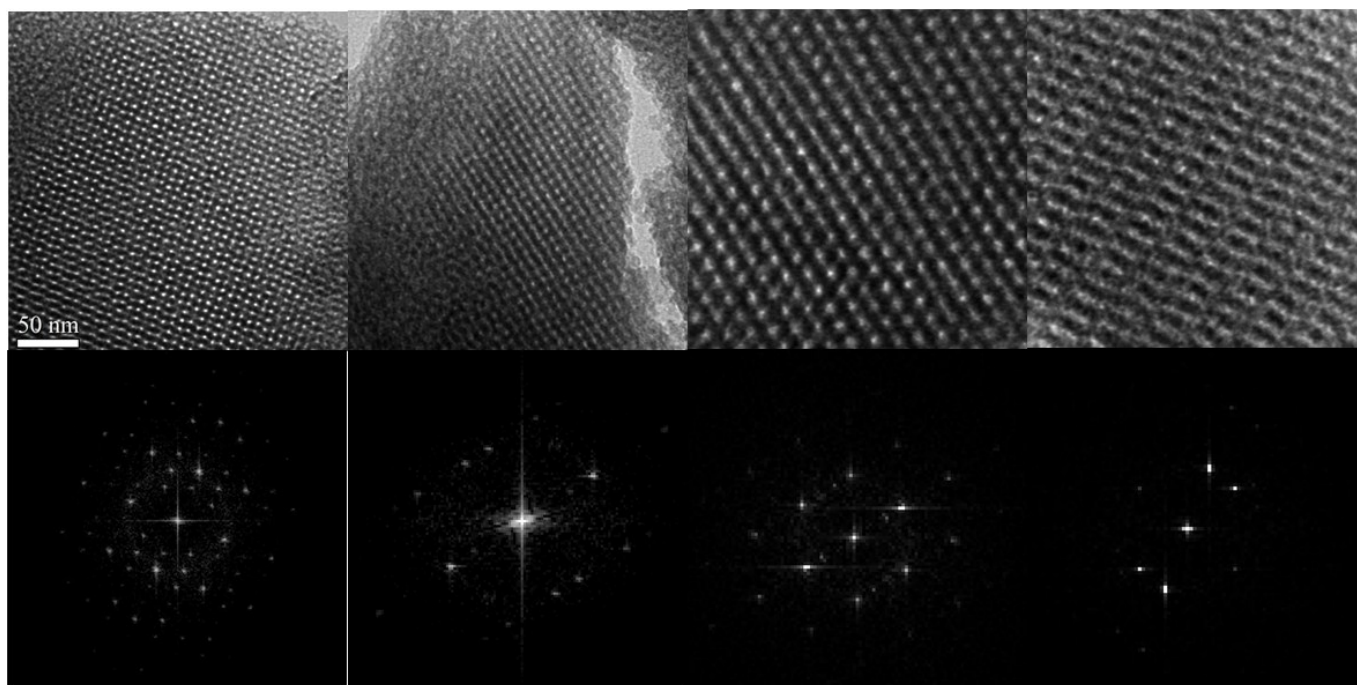

Figure S3. The other TEM images and corresponding FFT of mesoporous silica sample E1T40.



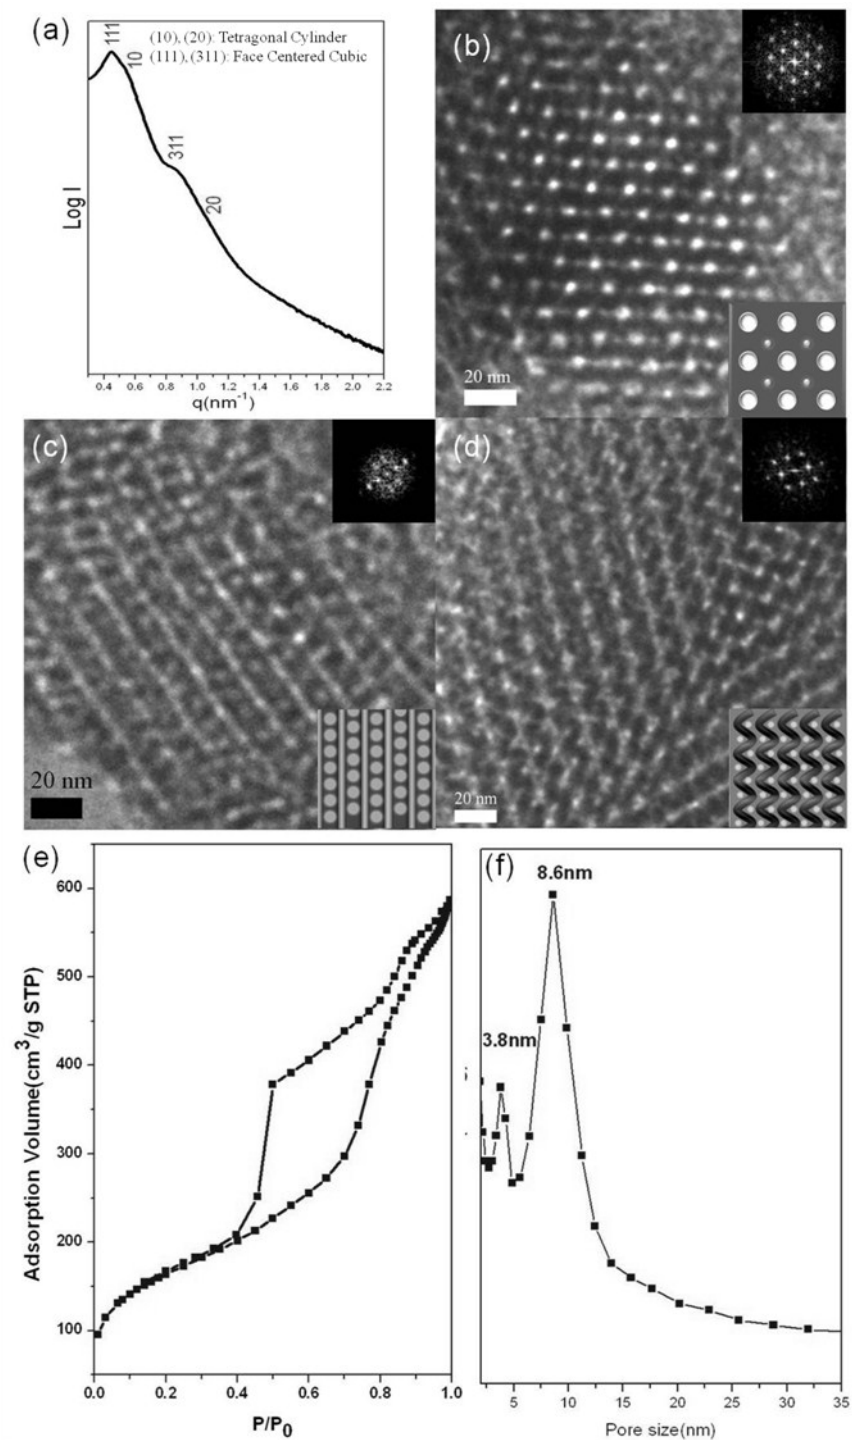

Figure S4. SAXS pattern (a) and microtomed TEM images of mesoporous silicas templated by  $E_{13}EO_{42}CL_{31}$  viewed from  $[001]$  (b),  $[10]$  (c), and  $[11]$  (d) directions. Insets are corresponding FFT diffractograms. (e)  $N_2$  adsorption-desorption isotherms and (f) pore size distribution curves of mesoporous silicas templated by  $E_{13}EO_{42}CL_{31}$ .
